# Supplementary material for: The Beneficial Effect of Lomitapide on the Cardiovascular System in LDLr−/− Mice with Obesity
Source: MDPI journal article supplement (doi:10.3390/antiox12061287), 2023-06-16
Supplement: s1 [file s1]

Supplementary Table 1. RT-qPCR primers are used for aorta gene expression analysis.

|                               |                         |                         |
|-------------------------------|-------------------------|-------------------------|
| <b>BIP</b>                    | TGCTTCTCAGCATCAAGCAAGG  | CCAACACTTCCTGGACAGGCTT  |
| <b>ATF6</b>                   | GTCCAAAGCGAAGAGCTGTCTG  | AGAGATGCCTCCTCTGATTGGC  |
| <b>ATF4</b>                   | AACCTCATGGGTCTCCAGCGA   | CTCCAACATCCAATCTGTCCCG  |
| <b>NOX2</b>                   | TGGCGATCTCAGCAAAAGGTGG  | GTACTGTCCCACCTCCATCTTG  |
| <b>P65</b>                    | TCCTGTTTCGAGTCTCCATGCAG | GGTCTCATAGGTCCTTTTGCGC  |
| <b>P50</b>                    | GCTGCCAAAGAAGGACACGACA  | GGCAGGCTATTGCTCATCACAG  |
| <b>TNF<math>\alpha</math></b> | GGTGCCTATGTCTCAGCCTCTT  | GCCATAGAACTGATGAGAGGGAG |
| <b>VCAM1</b>                  | GCTATGAGGATGGAAGACTCTGG | ACTTGTGCAGCCACCTGAGATC  |
| <b>GAPDH</b>                  | CATCACTGCCACCCAGAAGACTG | ATGCCAGTGAGCTTCCCGTTCAG |
